# Supplementary material for: Serum Cytokine Profile, Beta-Hexosaminidase A Enzymatic Activity and GM2 Ganglioside Levels in the Plasma of a Tay-Sachs Disease Patient after Cord Blood Cell Transplantation and Curcumin Administration: A Case Report
Source: MDPI journal article supplement (doi:10.3390/life11101007), 2021-09-24
Supplement: s1 [file s1]

Supplementary Material

**Table S1.** Multiplex analysis of cytokines in the blood serum of a patient with TSD.

| Analyte     | Analyte concentration in blood serum. pg/ml |                          |                           |                          |                           |                           |                           |                           |                           |                           |
|-------------|---------------------------------------------|--------------------------|---------------------------|--------------------------|---------------------------|---------------------------|---------------------------|---------------------------|---------------------------|---------------------------|
|             | Control<br>(n = 10)                         | Patient                  |                           |                          |                           |                           |                           |                           |                           |                           |
|             |                                             | Day 0<br>Before<br>UCBCT | Day 184<br>After<br>UCBCT | Day 252<br>500<br>mg/day | Day 262<br>1000<br>mg/day | Day 276<br>3500<br>mg/day | Day 290<br>3500<br>mg/day | Day 305<br>3500<br>mg/day | Day 323<br>3500<br>mg/day | Day 339<br>3500<br>mg/day |
| EGF         | 111.6 ±                                     | 345.4 ±                  | 153.4 ±                   | 151.4 ±                  | 263.6 ±                   | 260.4 ±                   | 63.2 ±                    | 180.5 ±                   | 514.6 ±                   | 184.5 ±                   |
|             | 103.4                                       | 0.8                      | 16.9                      | 38.21                    | 17.2                      | 4.9                       | 64.3                      | 31.4                      | 56.6                      | 12.4                      |
| Eotaxin     | 64.8 ±                                      | 200.6 ±                  | 155.7 ±                   | 192.0 ±                  | 203.8 ±                   | 160.8 ±                   | 4.1 ± 0.9                 | 146.4 ±                   | 107.5 ±                   | 93.1 ±                    |
|             | 28.7                                        | 1.9                      | 8.4                       | 13.3                     | 2.4                       | 5.6                       |                           | 20.4                      | 4.3                       | 17.5                      |
| FGF-2       | 86.81 ±                                     | 37.02 ±                  | 30.46 ±                   | 22.10 ±                  | 23.64 ±                   | 39.22 ±                   | 18.55 ±                   | 140.9                     | 40.15 ±                   | 34.45 ±                   |
|             | 101.17                                      | 4.60                     | 8.51                      | 8.07                     | 10.25                     | 9.72                      | 3.05                      |                           | 5.20                      | 0.97                      |
| FLT-3       | 15.94 ±                                     | 3.95 ±                   | 2.12 ±                    | 0.24 ±                   | 3.58 ±                    | 3.38 ±                    | 0.75 ±                    | 17.44 ±                   | 8.14 ±                    | 10.27 ±                   |
|             | 16.27                                       | 0.23                     | 1.77                      | 0.24                     | 0.89                      | 1.49                      | 0.75                      | 17.44                     | 1.36                      | 0.75                      |
| Fractalkine | 87.58 ±                                     | 38.49 ±                  | 35.52                     | 13.86                    | 29.01                     | 55.12                     | 35.52                     | 157.31 ±                  | 53.70 ±                   | 57.02 ±                   |
|             | 60.63                                       | 0.00                     |                           |                          |                           |                           |                           | 185.96                    | 21.51                     | 6.97                      |
| G-CSF       | 40.35 ±                                     | 16.90 ±                  | 13.04 ±                   | 8.92 ±                   | 11.77 ±                   | 19.14 ±                   | 13.17 ±                   | 47.31 ±                   | 18.20 ±                   | 13.96 ±                   |
|             | 24.78                                       | 0.37                     | 10.92                     | 2.47                     | 2.36                      | 6.53                      | 0.39                      | 51.02                     | 0.74                      | 2.29                      |
| GM-CSF      | 26.92 ±                                     | 14.61 ±                  | 11.71 ±                   | 10.95 ±                  | 11.99 ±                   | 16.49 ±                   | 11.53 ±                   | 38.64 ±                   | 15.88 ±                   | 15.23 ±                   |
|             | 15.24                                       | 1.32                     | 4.98                      | 4.74                     | 1.51                      | 4.84                      | 0.44                      | 37.03                     | 5.71                      | 2.19                      |
| GRO         | 1067.05                                     | 1851.31                  | 1403.99 ±                 | 1491.48 ±                | 1385.85                   | 1385.64                   | 702.75 ±                  | 1506.28                   | 988.86 ±                  | 1123.12 ±                 |
|             | ± 730.84                                    | ± 148.93                 | 415.19                    | 210.49                   | ± 442.97                  | ± 32.82                   | 85.92                     | ± 152.78                  | 1.28                      | 72.65                     |
| IFN-γ       | 36.94 ±                                     | 10.71 ±                  | 7.51 ±                    | 7.21 ±                   | 8.54 ±                    | 12.1 ±                    | 5.41 ±                    | 29.25 ±                   | 10.98 ±                   | 12.69 ±                   |
|             | 51.24                                       | 0.40                     | 1.68                      | 1.26                     | 1.03                      | 4.00                      | 0.43                      | 30.74                     | 2.42                      | 1.60                      |
| IL-10       | 4.83 ±                                      | 3.10 ±                   | 2.76 ±                    | 2.50 ±                   | 2.88 ±                    | 3.90 ±                    | 3.26 ±                    | 8.76 ±                    | 6.05 ±                    | 5.80 ±                    |
|             | 2.21                                        | 0.23                     | 1.03                      | 0.30                     | 0.15                      | 0.52                      | 0.31                      | 7.77                      | 0.86                      | 0.51                      |
| IL-12 (p40) | 37.48 ±                                     | <1.31                    | 1.31                      | <1.31                    | <1.31                     | 4.94                      | <1.31                     | 97.84                     | 3.19                      | <1.31                     |
|             | 36.83                                       |                          |                           |                          |                           |                           |                           |                           |                           |                           |
| IL-12 (p70) | 9.22 ±                                      | 3.45 ±                   | 2.53 ±                    | 2.45 ±                   | 2.68 ±                    | 4.00 ±                    | 3.22 ±                    | 15.10 ±                   | 3.34 ±                    | 2.89 ±                    |
|             | 12.30                                       | 0.16                     | 1.13                      | 0.30                     | 0.62                      | 1.26                      | 0.16                      | 17.59                     | 0.65                      | 0.32                      |
| IL-13       | 8.87 ±                                      | 2.06 ±                   | 2.62                      | <0.44                    | 1.17 ±                    | 2.37 ±                    | 1.28                      | 23.95                     | 2.97 ±                    | 1.47 ±                    |
|             | 6.14                                        | 0.00                     |                           |                          | 0.72                      | 2.12                      |                           |                           | 1.28                      | 0.84                      |
| IL-15       | 5.32 ±                                      | 2.18 ±                   | 1.35 ±                    | 1.33 ±                   | 1.61 ±                    | 2.88 ±                    | 2.18 ±                    | 10.96 ±                   | 2.34 ±                    | 2.18 ±                    |
|             | 4.47                                        | 0.14                     | 1.04                      | 0.26                     | 0.54                      | 1.12                      | 0.41                      | 13.36                     | 0.90                      | 0.41                      |
| IL-17A      | 9.67                                        | 5.41                     | 5.02                      | 4.67                     | 5.33                      | 5.81                      | 5.62                      | 8.66                      | 6.68                      | 5.94                      |
|             | 10.84                                       | 0.15                     | 1.31                      | 0.30                     | 0.78                      | 1.01                      | 0.00                      | 5.93                      | 0.90                      | 0.97                      |
| IL-1Rα      | 133.00 ±                                    | 24.64 ±                  | 14.30 ±                   | 8.58 ±                   | 14.69 ±                   | 26.42 ±                   | 25.25 ±                   | 149.81 ±                  | 21.07 ±                   | 20.96 ±                   |
|             | 181.83                                      | 3.56                     | 11.06                     | 4.33                     | 8.78                      | 16.18                     | 0.90                      | 202.69                    | 8.61                      | 5.17                      |

| Analyte         | Analyte concentration in blood serum. pg/ml |                 |                |               |                |                |                |                |                |                |
|-----------------|---------------------------------------------|-----------------|----------------|---------------|----------------|----------------|----------------|----------------|----------------|----------------|
|                 | Control<br>(n = 10)                         | Patient         |                |               |                |                |                |                |                |                |
|                 |                                             | Day 0           | Day 184        | Day 252       | Day 262        | Day 276        | Day 290        | Day 305        | Day 323        | Day 339        |
|                 |                                             | Before<br>UCBCT | After<br>UCBCT | 500<br>mg/day | 1000<br>mg/day | 3500<br>mg/day | 3500<br>mg/day | 3500<br>mg/day | 3500<br>mg/day | 3500<br>mg/day |
| IL-1 $\alpha$   | 55.24 $\pm$<br>60.18                        | <3.2            | <3.2           | <3.2          | <3.2           | 20.82          | 147.67         | <3.2           | <3.2           | <3.2           |
| IL-1 $\beta$    | 90.02 $\pm$                                 | 2.29 $\pm$      | 1.84 $\pm$     | 1.73 $\pm$    | 2.01 $\pm$     | 2.61 $\pm$     | 1.92 $\pm$     | 6.46 $\pm$     | 2.32 $\pm$     | 2.35 $\pm$     |
|                 | 195.09                                      | 0.00            | 0.32           | 0.16          | 0.40           | 0.69           | 0.28           | 6.53           | 0.52           | 0.40           |
| IL-2            | 5.81 $\pm$                                  | 3.35 $\pm$      | 2.81 $\pm$     | 2.49 $\pm$    | 2.46 $\pm$     | 3.52 $\pm$     | 2.78 $\pm$     | 6.87 $\pm$     | 2.92 $\pm$     | 3.21 $\pm$     |
|                 | 6.31                                        | 0.12            | 0.49           | 0.04          | 0.16           | 0.93           | 0.62           | 6.41           | 0.33           | 0.25           |
| IL-3            | 3.90 $\pm$                                  | 2.74 $\pm$      | 2.48 $\pm$     | 2.03 $\pm$    | 2.25 $\pm$     | 3.35 $\pm$     | 2.52 $\pm$     | 11.12 $\pm$    | 2.97 $\pm$     | 2.33 $\pm$     |
|                 | 2.80                                        | 0.20            | 0.95           | 0.06          | 0.25           | 0.93           | 0.52           | 12.17          | 0.40           | 0.00           |
| IL-4            | 26.18 $\pm$                                 | 8.79 $\pm$      | 1.84           | <0.66         | 3.01 $\pm$     | 5.70 $\pm$     | 31.13          | 58.81          | 5.33           | 3.01           |
|                 | 26.97                                       | 2.71            |                |               | 0.00           | 6.00           |                |                |                |                |
| IL-5            | 2.30 $\pm$                                  | 1.29 $\pm$      | 1.18 $\pm$     | 1.20 $\pm$    | 1.23 $\pm$     | 1.58 $\pm$     | 1.55 $\pm$     | 2.91 $\pm$     | 1.42 $\pm$     | 1.28 $\pm$     |
|                 | 2.14                                        | 0.01            | 0.30           | 0.18          | 0.07           | 0.30           | 0.12           | 2.54           | 0.16           | 0.04           |
| IL-6            | 66.49 $\pm$<br>108.84                       | <0.55           | <0.55          | <0.55         | <0.55          | <0.55          | <0.55          | 8.37           | <0.55          | <0.55          |
| IL-7            | 7.26 $\pm$                                  | 4.17 $\pm$      | 4.46 $\pm$     | 4.11 $\pm$    | 4.40 $\pm$     | 5.19 $\pm$     | 3.14 $\pm$     | 7.97 $\pm$     | 4.50 $\pm$     | 4.92 $\pm$     |
|                 | 3.78                                        | 0.15            | 0.47           | 0.78          | 0.18           | 0.83           | 1.50           | 5.72           | 0.23           | 0.45           |
| IL-8            | 7.8 $\pm$ 6.0                               | 21.30 $\pm$     | 8.11 $\pm$     | 7.18 $\pm$    | 8.88 $\pm$     | 9.74 $\pm$     | 4.84 $\pm$     | 11.56 $\pm$    | 69.58 $\pm$    | 9.33 $\pm$     |
|                 |                                             | 1.26            | 0.19           | 1.12          | 1.68           | 0.08           | 0.48           | 3.91           | 9.31           | 0.52           |
| IL-9            | 2.14 $\pm$                                  | 1.95 $\pm$      | 1.42 $\pm$     | 1.37 $\pm$    | 1.44 $\pm$     | 1.95 $\pm$     | 1.01 $\pm$     | 3.39 $\pm$     | 1.84 $\pm$     | 1.84 $\pm$     |
|                 | 1.00                                        | 0.19            | 0.31           | 0.16          | 0.25           | 0.43           | 0.56           | 3.09           | 0.28           | 0.04           |
| IP-10           | 73.9 $\pm$                                  | 80.37 $\pm$     | 95.22 $\pm$    | 35.22 $\pm$   | 66.13 $\pm$    | 59.49 $\pm$    | 71.40 $\pm$    | 62.06 $\pm$    | 23.35 $\pm$    | 28.82 $\pm$    |
|                 | 26.3                                        | 2.69            | 34.16          | 2.52          | 13.82          | 6.46           | 6.72           | 18.66          | 1.12           | 2.32           |
| IFN- $\alpha$ 2 | 71.29 $\pm$                                 | 52.21 $\pm$     | 30.33 $\pm$    | 28.02 $\pm$   | 25.75 $\pm$    | 60.83 $\pm$    | 38.47 $\pm$    | 153.15 $\pm$   | 43.21 $\pm$    | 41.13 $\pm$    |
|                 | 52.71                                       | 2.99            | 24.88          | 11.75         | 0.00           | 18.25          | 10.23          | 165.22         | 9.74           | 0.00           |
| MCP-1           | 498.76 $\pm$                                | 495.64 $\pm$    | 376.06 $\pm$   | 414.49 $\pm$  | 350.89 $\pm$   | 431.35 $\pm$   | 317.76 $\pm$   | 418.13 $\pm$   | 472.58 $\pm$   | 459.27 $\pm$   |
|                 | 313.57                                      | 30.47           | 70.66          | 25.09         | 10.61          | 14.22          | 3.05           | 4.43           | 12.83          | 24.08          |
| MCP-3           | 81.19 $\pm$<br>110.50                       | <2.6            | <2.6           | <2.6          | <2.6           | <2.6           | <2.6           | 29.75          | <2.6           | <2.6           |
| MDC             | 413.3 $\pm$                                 | 1127.93         | 874.83 $\pm$   | 836.22 $\pm$  | 542.88 $\pm$   | 753.40 $\pm$   | 272.61 $\pm$   | 832.64 $\pm$   | 756.08 $\pm$   | 1052.10 $\pm$  |
|                 | 175.8                                       | $\pm$ 5.67      | 264.53         | 106.58        | 28.79          | 60.32          | 284.41         | 105.23         | 95.04          | 23.14          |
| MIP-1 $\alpha$  | 480.81 $\pm$                                | 3.17 $\pm$      | 2.97 $\pm$     | 2.77 $\pm$    | 2.71 $\pm$     | 3.31 $\pm$     | 2.95 $\pm$     | 5.09 $\pm$     | 3.37 $\pm$     | 3.02 $\pm$     |
|                 | 818.68                                      | 0.00            | 0.38           | 0.15          | 0.23           | 0.30           | 0.11           | 2.93           | 0.03           | 0.21           |
| MIP-1 $\beta$   | 265.97 $\pm$                                | 17.57 $\pm$     | 11.24 $\pm$    | 11.24 $\pm$   | 15.79 $\pm$    | 21.93 $\pm$    | 8.78 $\pm$     | 46.90 $\pm$    | 21.93 $\pm$    | 20.39 $\pm$    |
|                 | 530.85                                      | 0.82            | 4.74           | 4.74          | 1.70           | 5.34           | 4.64           | 47.44          | 5.34           | 1.56           |
| PDGF-AA         | 1666.50                                     | 2715.05         | 1506.22 $\pm$  | 1228.69 $\pm$ | 2014.0 $\pm$   | 2106.62        | 291.79 $\pm$   | 1481.40        | 668.78 $\pm$   | 577.02 $\pm$   |
|                 | $\pm$ 867.94                                | $\pm$ 74.53     | 1296.07        | 214.92        | 193.58         | $\pm$ 179.44   | 243.00         | $\pm$ 208.94   | 33.70          | 30.00          |

| Analyte        | Analyte concentration in blood serum. pg/ml |                          |                           |                          |                           |                           |                           |                           |                           |                           |
|----------------|---------------------------------------------|--------------------------|---------------------------|--------------------------|---------------------------|---------------------------|---------------------------|---------------------------|---------------------------|---------------------------|
|                | Control<br>(n = 10)                         | Patient                  |                           |                          |                           |                           |                           |                           |                           |                           |
|                |                                             | Day 0<br>Before<br>UCBCT | Day 184<br>After<br>UCBCT | Day 252<br>500<br>mg/day | Day 262<br>1000<br>mg/day | Day 276<br>3500<br>mg/day | Day 290<br>3500<br>mg/day | Day 305<br>3500<br>mg/day | Day 323<br>3500<br>mg/day | Day 339<br>3500<br>mg/day |
| PDGF-<br>AB/BB | 13383.03                                    | 18810.22                 | 13559.09±<br>6397.54      | 13709.74±<br>3150.71     | 16717.45                  | 17081.77                  | 7567.23                   | 13494.22                  | 16254.75                  | 17076.81                  |
|                | ±                                           | ±                        |                           |                          | ±                         | ±                         | ±                         | ±                         | ±                         | ±                         |
|                | 5559.26                                     | 79.35                    |                           |                          | 465.17                    | 221.58                    | 496.18                    | 3767.37                   | 976.86                    | 463.01                    |
| RANTES         | 1527.08                                     | 900.40 ±<br>6.02         | 721.65 ±<br>295.42        | 533.02 ±<br>207.27       | 730.69 ±<br>54.96         | 837.43 ±<br>3.40          | 463.61 ±<br>77.27         | 440.44 ±<br>200.50        | 828.72 ±<br>0.32          | 797.66 ±<br>76.37         |
|                | ±                                           |                          |                           |                          |                           |                           |                           |                           |                           |                           |
|                | 1796.76                                     |                          |                           |                          |                           |                           |                           |                           |                           |                           |
| TGF-α          | 6.14 ±                                      | 4.88 ±                   | 6.17 ±                    | 5.80 ±                   | 8.58 ±                    | 7.56 ±                    | 6.27 ±                    | 7.61 ±                    | 7.80 ±                    | 6.09 ±                    |
|                | 4.97                                        | 0.04                     | 1.07                      | 1.26                     | 0.40                      | 0.04                      | 0.13                      | 2.38                      | 0.54                      | 0.24                      |
| TNFα           | 59.43 ±                                     | 15.77 ±                  | 12.92 ±                   | 9.06 ±                   | 12.09 ±                   | 14.41 ±                   | 12.40 ±                   | 15.95 ±                   | 15.03 ±                   | 16.69 ±                   |
|                | 84.87                                       | 0.93                     | 1.74                      | 2.50                     | 0.31                      | 0.13                      | 1.00                      | 11.75                     | 3.09                      | 0.37                      |
| TNFβ           | 1.77 ±                                      | <0.14                    | <0.14                     | <0.14                    | <0.14                     | 0.56                      | 13.72                     | <0.14                     | <0.14                     | <0.14                     |
|                | 3.08                                        |                          |                           |                          |                           | 0.12                      |                           |                           |                           |                           |
| VEGF           | 138.21 ±                                    | 387.52 ±                 | 346.73 ±                  | 299.56 ±                 | 298.64 ±                  | 335.58 ±                  | 151.65 ±                  | 327.34 ±                  | 296.08 ±                  | 305.02 ±                  |
|                | 133.74                                      | 29.81                    | 10.09                     | 60.66                    | 33.30                     | 0.41                      | 82.09                     | 51.23                     | 3.72                      | 15.05                     |
| sCD40L         | 4576.1 ±                                    | 10260.30                 | 6275.93 ±<br>2162.01      | 6755.18 ±<br>1381.52     | 8371.31                   | 8683.64                   | 4436.18                   | 6369.35                   | 8264.04                   | 8345.55 ±<br>393.17       |
|                | ±                                           | ±                        |                           |                          | ±                         | ±                         | ±                         | ±                         | ±                         |                           |
|                | 3168.7                                      | 793.15                   |                           |                          | 542.94                    | 11.13                     | 702.71                    | 1405.86                   | 110.10                    |                           |

Table S2. Results of the clinical studies of curcumin.

| Study participants                   | Drug                                | Dose (mg) | Duration                   | Blood concentration (ng/mL) | Half-life (hours) | Effect                                                                                        | Reference |
|--------------------------------------|-------------------------------------|-----------|----------------------------|-----------------------------|-------------------|-----------------------------------------------------------------------------------------------|-----------|
| Healthy volunteers                   | γ-cyclodextrin curcumin formulation | 10 000    | Single dose administration | 73.2                        | 6.8 ± 0.8         | The γ-cyclodextrin-curcumin composition significantly improves the absorption of curcuminoids | [76]      |
| Healthy volunteers                   | Curcumin nanoparticles              | 150       | Single dose administration | 189                         | 9.7 ± 2.1         | No side effects were observed                                                                 | [77]      |
| Healthy volunteers                   | Lipid nanoparticles                 | 160       | Single dose administration | 22.43                       | 7.5 ± 2.4         | No side effects were observed                                                                 | [78]      |
| Patients diagnosed with osteosarcoma | Lipid nanoparticles                 | 2000      | Single dose administration | 32.51                       | 2.45 ± 0.47       | No side effects were observed                                                                 | [78]      |
| Patients diagnosed with osteosarcoma | Lipid nanoparticles                 | 3000      | Single dose administration | 31.42                       | 7.50 ± 0.01       | No side effects were observed                                                                 | [78]      |

|                                             |                                                                  |                         |                            |        |            |                                                                                          |      |
|---------------------------------------------|------------------------------------------------------------------|-------------------------|----------------------------|--------|------------|------------------------------------------------------------------------------------------|------|
| Patients diagnosed with osteosarcoma        | Lipid nanoparticles                                              | 4000                    | Single dose administration | 41.15  | 7.62± 1.09 | No side effects were observed                                                            | [78] |
| Patients diagnosed with cancer              | Curcumin (diferuloylmethane) 99.3%                               | 8 000                   | 3 months                   | 652.03 |            | No dose-related toxicity was observed                                                    | [79] |
| Patients diagnosed with pancreatic cancer   | Theracurmin®                                                     | 400                     | 9 months                   | 440    |            | No side effects were observed                                                            | [80] |
| Older people                                | Longvida®                                                        | 400                     | 4 weeks                    | 2575   | 2.8        | Cognitive function improvement                                                           | [81] |
| Healthy volunteers                          | 85% curcumin, 12% demethoxycurcumin, and 3% bisdemethoxycurcumin | 2 000                   | Single dose administration | 11     |            | No side effects were observed                                                            | [82] |
| Healthy volunteers                          | C3 Complex™                                                      | 12 000                  | Single dose administration | 1730   | 6.77       | Curcumin glucuronide and curcumin sulfate were found in plasma after oral administration | [83] |
| Healthy volunteers                          | Theracurmin®                                                     | 90 (twice a day)        | 18 months                  |        |            | Memory and attention improvement                                                         | [84] |
| Patients diagnosed with knee osteoarthritis | BCM-95®                                                          | 500 (three times a day) | 28 days                    |        |            | Similar efficacy to diclofenac                                                           | [85] |
